# Supplementary material
Source: publisher figshare collection journal article supplement (https://frontiersin.figshare.com/ndownloader/files/26419055)
Supplement: Supplementary file [file 26419055]

Spiro N, Perkins R, Kaye S, Tymoszek U, Mason-Bertrand A, Cossette I, Glasser S, and Williamon A (2021), The Effects of COVID-19 Lockdown 1.0 on Working Patterns, Income, and Wellbeing among Performing Arts Professionals in the United Kingdom (April–June 2020), *Front. Psychol.* 11:594086. doi: 10.3389/fpsyg.2020.594086.

**SUPPLEMENTARY TABLE 6 |** Sources of support, *HEarts Professional Survey*, *N*=385.

|                                                                                                                    | <i>n</i>   | %   |
|--------------------------------------------------------------------------------------------------------------------|------------|-----|
| <b>Financial support (see Supplementary Figure 1, <i>HEarts Professional Survey</i>, question 5.9)</b>             | <b>203</b> |     |
| Yes                                                                                                                | 124        | 61% |
| No                                                                                                                 | 79         | 39% |
| <b>If yes, where? (see Supplementary Figure 1, <i>HEarts Professional Survey</i>, question 5.10)</b>               | <b>124</b> |     |
| Colleagues                                                                                                         | 86         | 69% |
| Charities (arts-specific)                                                                                          | 41         | 33% |
| Charities (general)                                                                                                | 9          | 7%  |
| Educational institutions                                                                                           | 17         | 14% |
| Employers                                                                                                          | 34         | 27% |
| Family / friends                                                                                                   | 73         | 59% |
| Finance professionals (arts-specific) / advisors / banks / finance helplines                                       | 22         | 18% |
| Finance professionals (general) / advisors / banks / finance helplines                                             | 31         | 25% |
| Government-based agencies                                                                                          | 49         | 40% |
| Insurers                                                                                                           | 3          | 2%  |
| Teachers / coaches / mentors                                                                                       | 8          | 7%  |
| Trade unions                                                                                                       | 56         | 45% |
| Other                                                                                                              | 7          | 6%  |
| <b>Health and wellbeing support (see Supplementary Figure 1, <i>HEarts Professional Survey</i>, question 5.12)</b> | <b>203</b> |     |
| Yes                                                                                                                | 91         | 45% |
| No                                                                                                                 | 112        | 55% |
| <b>If yes, where? (see Supplementary Figure 1, <i>HEarts Professional Survey</i>, question 5.13)</b>               | <b>91</b>  |     |
| Colleagues                                                                                                         | 54         | 59% |
| Charities (arts-specific)                                                                                          | 12         | 13% |
| Charities (general)                                                                                                | 8          | 9%  |
| Educational institutions                                                                                           | 8          | 9%  |
| Employers                                                                                                          | 9          | 10% |
| Family / friends                                                                                                   | 60         | 66% |
| Health professionals (arts-specific) / advisors / hospitals / helplines                                            | 6          | 7%  |
| Health professionals (general) / advisors / hospitals / helplines                                                  | 25         | 28% |
| Government-based agencies                                                                                          | 5          | 6%  |
| Insurers                                                                                                           | 1          | 1%  |
| Teachers / coaches / mentors                                                                                       | 10         | 11% |
| Trade unions                                                                                                       | 11         | 12% |
| Other                                                                                                              | 8          | 9%  |
